# Supplementary material
Source: PubMed Central journal article supplement (PMC3927372)
Supplement: NIHMS536212-supplement-01.pdf [file NIHMS536212-supplement-01.pdf]

**Alternative Spliceosome Assembly Pathways**  
**Revealed by Single Molecule Fluorescence Microscopy**

Inna Shcherbakova, Aaron A. Hoskins, Larry J. Friedman, Victor Serebrov,  
Ivan R. Corrêa Jr., Ming-Qun Xu, Jeff Gelles, and Melissa J. Moore

**Supplemental Text**

- |                                     |           |
|-------------------------------------|-----------|
| 1. Supplemental Figure Legends      | pg. 2     |
| 2. Extended Experimental Procedures | pg. 3 - 8 |
| 3. Supplemental References          | pg. 9     |

## Supplemental Figure Legends

### **Figure S1.** Binding of spliceosomal subcomplexes by surface-tethered pre-mRNAs.

Related to Figure 2.

**A.** The distributions of the number of binding events for the U1, U2, U5 and NTC spliceosomal subcomplexes observed on individual pre-mRNA molecules over the first 20 min of the experiments are shown in Figure 2D. All data are from CoSMoS experiments in WCE in which a single spliceosomal subcomplex was labeled with Cy3-TMP. Only binding events observable in two or more consecutive frames (duration  $\geq 1.5$  sec) were included in the analysis. **B.** Distribution of the time intervals ( $t_{U2} - t_{U1}$ ) between the binding of U1 and the binding of U2 for the formation of U1•U2•*RPS30A* pre-mRNA pre-spliceosomes in WCE CoSMoS experiments. U1 was labeled with red fluorophores on two different proteins and U2 was labeled with a single green fluorophore as described (Hoskins et al., 2011).

### **Figure S2.** Control experiments to monitor binding of fluorescent U1, U2 and U5 snRNPs from triply-labeled WCE to surface-tethered pre-mRNAs. Related to Figure 3.

**A.** Subcomplex binding to *RPS30A* pre-mRNA in triply-labeled WCE. Plots indicate the number of U1, U2 and U5 spots in the same field of view during the first 1700 seconds of incubation of the surface-tethered pre-mRNA in WCE containing 2 mM ATP. **B.** Same as A, but using WCE depleted of ATP. **C.** Same as A, but in a control sample with no surface-tethered pre-mRNA, recorded during the first 900 seconds of incubation. **D.** Correlation between U5 binding and the preceding U1•U2•pre-mRNA complex formation event for complexes that formed by the U1→U2→U5 (red) and the U2→U1→U5 (green) pathways. Each point on the plot indicates the time after WCE addition for U5 snRNP binding to an individual *RPS30A* pre-mRNA molecule, and the time after WCE addition for formation on the same pre-mRNA molecule of the U1/U2/pre-mRNA complex that most closely preceded U5 binding. The experiment (see Figure 3) used triply-labeled WCE in the presence of 2 mM ATP. **E.** Profile of fluorescence of CUS1 labeled by CLIP-Surface™ 547 from untreated (solid line) and micrococcal nuclease treated (dashed line) WCE after 10-30% glycerol gradient sedimentation.



## Extended Experimental Procedures

### Preparation of the pre-mRNAs

The sequences of gene segments used to transcribed pre-mRNAs are listed below, with exon sequences highlighted in gray, and splice site and branch point sequences shown in red ([http://compbio.soe.ucsc.edu/yeast\\_introns.html](http://compbio.soe.ucsc.edu/yeast_introns.html))

#### *RPS30A:*

GGCTGCACATTAAATTTGCCACTGTAATAATCTTCCATATCCCCATACAAAACACTACGCAA  
TATG**GT**ACGTAATGCCTCATTAGGATTTTAAAATATGAAAAAATGGACGTTTCAGCGAGGA  
ATGAATAACAAGAAATAGCTAATTTGAATATATTACTGGTGTTCATATCTATATATACCGCA  
GAAAAGAAATAAACGCAATATATCTTTAAACTGGCTCCACCCTGAGAATATGATAGGAAA  
CTTTTTAAATTTGAGTTCTGTTACATCAAAAACGTAATTGCTTGACACAGATTTTTTCGAGGGC  
AACAGCGTGGACTTAACATAATGTCGAGTTTAATAACAACATTTTTTGACGGAGAGTTAAAA  
AGGCTTTGAGAAAATAGCAGAGTGAAGTTTATTTTTAGCATCCTTGCTGATACGCCAAATAA  
TTCAAAATTCACTA**TACTAAC**ATGGTCATTAATTTTTAATTAATATTATTTATTT**AG**GCTA  
AAGTTCATGGTTCTCTAGCTCGTGCTGGTAAAGTCAAGTCTCAAAC

#### *RPS30B:*

GGATTCTGAATTAGCACTCCTTCCTCAAGATACTAGATAAACAAATTATACAAAATG**GT**ACG  
TTAATATTGTGTTAAAATGCTCCACGAAACGCTTTTTTTAGGAACTTGTCACCATACAGGA  
AGAAGGTGTATTAAGGGAAACTACGATCAAAGTAATTTTTGAATAGGAAAGATTGCC  
CATGATAATATTAATAATCCATCAAATGCCTGTAGATAATGACTGAAAATGAAAAGAAAATA  
AAATATTGTATCATTATTATGTTGAGATGTAAATGTACAAAAAGGAAGAAAGACGAGAATTT  
CAAAGGACGATTATTCTCGTTAATATTCACAACATGTTGAATATAGACCTTTCCTAAAAAATT  
AGCGTCTGCGTTGCAGTAACTCCATAACACAAGTCTGAATATCTCATT**TACTAAC**ATTAATG  
AAAATTTTTTTTTTTTCAAATTCTCCTT**AG**GCTAAAGTTCACGGTTCTCTAGCTCGTGCTGG  
TAAAGTTAAGTCTCAAAC

#### *ACT1:*

GGTTTCTACTCAAACCAAGAAGAAAAGAAAAGGTCAATCTTTGTTAAAGAATAGGATCTTC  
TACTACATCAGCTTTTAGATTTTTACGCTTACTGCTTTTTTTCTTCCCAAGATCGAAAATTA

CTGAATTAACAATGGATTCTG**GT**ATGTTCTAGCGCTTGCACCATCCCATTAACTGTAAGAA  
GAATTGCACGGTCCCAATTGCTCGAGAGATTTCTCTTTTACCTTTTTTACTATTTTCACTC  
TCCCATAACCTCCTATATTGACTGATCTGTAATAACCACGATATTATTGGAATAAATAGGGG  
CTTGAAATTTGGAAAAAAAAAAAACTGAAATATTTTCGTGATAAGTGATAGTGATATTCTTC  
TTTTATTTGCTACTGTTACTAAGTCTCATG**TACTAAC**ATCGATTGCTTCATTCTTTTTGTTGC  
TATATTATATGTTT**AG**AGGTTGCTGCTTTGGTTATTGATAACGGTTCTGGTATGTGTAAAGC  
CGGT

*UBC4:*

GGAAATCTATCCTGAAAAAAAAATAAGTAAAGAAGCCAGGAAAATCACTATCGCCACAAGTA  
AATAAATTTCACTGACTATAGAGTACATACATAAACAAGCATCCAAAAAACATGTCTTCTTC  
TAAACGTATTGCTAAAGAATAAGTGATCTAGAAAG**GT**ATGTCTAAAGTTATGGCCACGTTT  
CAAATGCGTGCTTTTTTTTTTAAACTTATGCTCTTATT**TACTAAC**AAAATCAACATGCTATTG  
AACT**AG**AGATCCACCTACTTCATGTTCAAGCCGGTCCAGTCGGCGATGATCTATATC

*TEF4:*

GGACTGGTGTCCATCCTTAATACCAACTCAATTCTTTGATTTTGGCCCTCGATAGATTCAAG  
ATGTCCCAAGGTACTTTATACATTAATAGATCTCCAAGAACTACGCTTCTGAAGCTTTGAT  
TTCTTACTTTAAACTAGATGTCAAGATCGTTGATCTAGAACAATCTAGCGAGTTTGCTTCTTT  
GTTCCATTGAAGCAAGCCCCTGCATTTTTGGGTCCAAGGGCTTAAAGCTAACTGAAGCT  
TTGGCTATCCAATTTTATT**GT**ATGTTCCATATTTTATTTTAACTTCCACATACATTGTTTTG  
CGCGTTTCCGTTCTTTTATTTGGCACGTCATTTTCTTCGAAACATAATGATGAAAAAAAT  
TTTATCAAACAGTTATCCCTGTCTGAATGGGTAATAATAGGTAACCTCTCATATGTTGATATT  
TGTATTTCTGATATGTTTCTTAAAGAAAAATGAAAGTCAAATAACAAAAGGAAGTACAAAG  
CGTGCCTAATCCAGGAAAAAATATAAAGGATTGTTTT**TACTAAC**ATTTCTTCAATTAATGGTT  
GTATAACCATCGAGATGATGTATTTT**AG**TGGCTAATCAAGTTGCCGATGAAAAAGAAAGA  
GCTCGCTTATTAGGTTCC

*IMD4:*

GGTTGGGCTTAAATTTTTTACGAAAAAATGGTGGCTTTTACATTTTCTCTGGTCTTCTTTGC  
TGCTTGAACCAAAGGATATTGGACCAATTCCATAGCTTTGAAGAAACCTAACAAACATTTTA

CGATGAGTGCTGCTCCATTGGATTACAAAAAGGCTTTAGAACATTTGAAGACATACAGTTCC  
AAGGACGGTCTTTCTGTCCAGGAATTGATGGACTCCACAAGTAGAGGTGGGTTGACCTACA  
ATGATTTTTTGGTCTTACCAGGCTTGGTCAATTTCCCATCTTCTGCTGTCAGTTTGCAAACC  
AAATTGACCAAGAAAATCACTTTGAACACTCCTTTTGTCTCTTCTCCTATGGACACAGTCAC  
TGAAGCTGATATGGCTATTTATATGGCTTTATTGGGTGGTATTGGTTTCATCCATCACAAGT  
GTAAGCTGATATGGCTATTTATATGGCTTTATTGGGTGGTATTGGTTTCATCCATCACAAGT  
GTACTCCAAAGGAACAGGCTTCCATGGTCAAGAAAGTTAAAATGTTTGAAAACGGTTTCATC  
AATTCTCCAATAGTAATTTCTCCAACCACCACTGTTGGTGAAGTTAAGGTTATGAAGAGAAA  
GTTTGGTTTCTCTGGCTTCCCAGTTACTG**GT**ATGTTATAATAGACAAAATTTTTGGTATTATG  
TTTTCTTTCATTAGAATGCGCTTTTTAATCATCCATAAAGTTTTCCAAGGTGTGAAAAAGATCT  
AAGATGATGATCAACTTTTTATATCAATAACTTTTCGTTCTACTGACTGTGATCAAACGATCTT  
GTAGAGAAGTCTTACTCTGAATTAATCATATTCGCACCTTTTTTCGGAAAGCCCATTATGTGT  
GATTAATTGACGTGCAGTGCAGTGCAGTGCAGTGCAGTGCAGTGCAGTGCAGTGCAGTGCAGT  
ATTT**ACTAAC**ATTGCTATGTAATACTGTTATTTTTTTTTCTTTTCTGGCTGGGCTGAAAATTT  
CTTCAGTCTTCATAAAGTTGAGAAAATAAAAGGAAACAAGTACATCTTTTTGAACAC**AG**AAG  
ACGGTAAGTGTCCAGGTAAGTTAGTTGGGTTAGTCACCTCTCGTGAT

*RPS17A*:

GGAAAGTCAAGATCTCGAGACTAGCAATAACAAAATG**GT**ATGTTAATATGGACTAAAGGAG  
GCTTTTAAGGACACGTAATATTGAGTCGACATGCGCAATAAAGTCATACAATAAATAAGTTA  
AAGAAAACATATGACGATATTTTCAGACGATATGGAAGTGCATACCGAAAAAGTGGTGTG  
ATTGAAATGATACTCATGTTTTGGCTATAGTTGCAGTGGCTTTCCAAAAAATTGGGAGTTAA  
AATGCCTATAGCAGTATCACCGGAGATTGAGTCTCTTGTGGATCTTCTTTTTGCATAGTTGA  
ACAAGGGATAATATGGCGCCATGAACTGCCTCTACACATTATAATGTGTTTTTATATCAGT  
A**ACTAAC**AAAGTTGAATTGCATTTACAACTTTTTATTTTGTATTGCTTTTCGTCATTTTAAT**A**  
**G**GGTAGAGTTAGAACCAAGACCGTCAAGCGTGCTTCTAAGGCTTTGATTGA

The part of the *RPS17A* intron that is deleted in the *RP51A* pre-mRNA is underlined.

The intron-labeled *RPS30A* pre-mRNA was constructed from three transcripts (the exons, splice site and branch point sequences are shown as above) that were synthesized using T7 RNA polymerase:

The first transcript,

m<sup>7</sup>G(5')ppp(5')GGCUGCACAUUAAAUUUGCCACUGUAAUAAUCUCCAUAUCCCCA  
UACAAAACUACGCAAUAUG**GU**ACGUAAUGCCUCAUUAGGAUUUUAAAAUAUGA  
AAAAAUGGACGUUUCAGCGA,

was synthesized with a 5' cap analog (New England Biolabs). The second transcript  
GGAAUGAAUAACAAGAAUAGCUAAUUUGAAUAUAUUACUGGUGUUUCAUAUCU  
AUAUAUACCGCAGAAAAGAAAUAAAACGCAAUAUAUCUUAAACUGGCUCCACC  
CUGAGAAUAUGAUAGGAAACUUUUUAAAUUUGAGUUCUGUUACAUCAAAACGU  
AAUUGCUUGACACAGAUUUUUCGAGGGCAACAGCGUGGACUUAACAUA AUGUCG  
AGUUUAAUAACAACAUUUUUUGACGGAGAGUUAAAAA,

was synthesized using 1:1 molar ratio of UTP:5-(3-aminoallyl)-UTP, then labeled with  
Alexa488 tetrafluorophenyl ester (ARES DNA labeling kit, Invitrogen, Molecular  
Probes). The third transcript,

GGCUUUGAGAAAUAGCAGAGUGAAGUUUAUUUUUAGCAUCCUUGCUGAUACGC  
CAAUAUUUCAAAAUUCACUA**UACUAAC**AUGGUCAUUAUUUUUAAUAUUAUA  
UUAUUUAUUU**AG**GCUAAAGUUCAUGGUUCUCUAGCUCGUGCUGGUAAGUCA  
GUCUCAAC,

was post-transcriptionally biotinated using splint-directed extension by Klenow fragment  
(3'→5' exo<sup>-</sup>) (New England Biolabs) and the splint oligonucleotide (5'-  
GTTTTTTATTATGTTTGAGACTTGACTTTACCAGddC-3') with biotin-dCTP in addition  
to dATP and dTTP nucleotides in the extension mix. The three transcripts were joined  
by splinted ligation using T4 RNA ligase 1 (Moore and Query, 2000; Stark et al., 2006)  
to produce the intron-labeled *RPS30A* pre-mRNA.

The average number of Alexa488 dyes per intron-labeled *RPS30A* was  
determined spectrophotometrically by first measuring the dye concentration using  $\epsilon_{495} =$   
71,000 cm<sup>-1</sup> M<sup>-1</sup> for the Alexa488 absorbance at 495 nm. The RNA concentration was  
determined after correcting the absorbance at 260 nm as  $A_{260} - 0.3 A_{495}$ , where 0.3 is  
the Alexa488  $\epsilon_{260}/\epsilon_{495}$  ratio. The *RPS30A* concentration was then calculated from the  
corrected RNA absorbance at 260 nm (one unit corrected absorbance at 260 nm = 40

$\mu\text{g/ml}$ ,  $M_r = 181,576 \text{ g/mol}$ ). For the intron-labeled RPS30A preparation this procedure measured eight Alexa488 dye moieties per RNA molecule.

### **Preparation of the yeast strain to monitor U1, U2 and U5 binding**

The yeast strain used to simultaneously monitor U1, U2 and U5 binding was prepared from the yeast strain bearing C-terminal eDHFR tags on SNP1 and PRP40 of U1 snRNP (Hoskins et al., 2011) by sequential C-terminal tagging of BRR2 (U5 snRNP) with the SNAP<sub>f</sub> tag and of CUS1 (U2 snRNP) with the CLIP<sub>f</sub> tag through (Gly-Ser-Gly)<sub>2</sub> linkers as described in (Hoskins et al., 2011). The fast CLIP (CLIP<sub>f</sub>) gene was amplified from the pCLIP<sub>f</sub> plasmid (New England Biolabs) by PCR, digested with the HindIII and BamHI restriction enzymes, and ligated into the pAG61 plasmid containing the *URA3* marker (Euroscarf) at the HindIII and BamHI sites. This created the pAG61-fCLIP plasmid (pAAH0026), and the CLIP<sub>f</sub> insert was fully sequenced. The fast SNAP (SNAP<sub>f</sub>) gene was amplified from the pSNAP<sub>f</sub> plasmid (New England Biolabs) by PCR, digested with the HindIII and BamHI restriction enzymes, and ligated into the pAG25 plasmid containing the *NAT1* marker (Euroscarf) at the HindIII and BamHI sites. This created the pAG25-fSNAP plasmid (pAAH0034), and the SNAP<sub>f</sub> insert was fully sequenced.

### **Glycerol gradient fractionation of the triply labeled WCE**

The triply labeled WCE was prepared and the SNAP<sub>f</sub> tag of BRR2 and CLIP<sub>f</sub> tag of CUS1 were labeled with SNAP-Surface® 488 and CLIP-Surface™ 547, respectively, as described in Experimental Procedures. For fractionation of snRNPs, 200  $\mu\text{L}$  of 40% WCE in splicing buffer without PEG and ATP was loaded onto a 13 ml glycerol gradient (10 - 30% glycerol in the same buffer; gradient formed by a Gradient Master (Biocomp)). The WCE used for the fractionation was either untreated or treated with micrococcal nuclease as described in He et al., 2008. After the ultracentrifugation (29,000 rpm, Beckman SW40Ti rotor, 24 hours at 4 °C) the 500  $\mu\text{L}$  fractions were collected from the top of the gradient using a density gradient fractionator (Isco) by introducing a 50% glycerol solution to the bottom of the tube. Proteins from each fraction were precipitated

by trichloroacetic acid and analyzed by 8% SDS-PAGE. Fluorescent proteins bands were detected by a Typhoon scanner (GE) and band intensities were measured by ImageQuant software (GE).

### **Supplemental References**

He, F., Amrani, N., Johansson, M.J.O., Jacobson, A. (2008) *Methods In Enzymology* 449, 127-147.

[http://compbio.soe.ucsc.edu/yeast\\_introns.html](http://compbio.soe.ucsc.edu/yeast_introns.html)

Moore, M.J., and Query, C.C. (2000). Joining of RNAs by splinted ligation. *Methods In Enzymology* 317, 109-123.

Stark, M.R., Pleiss, J.A., Deras, M., Scaringe, S.A., and Rader, S.D. (2006). An RNA ligase-mediated method for the efficient creation of large, synthetic RNAs. *RNA* 12, 2014-2019.

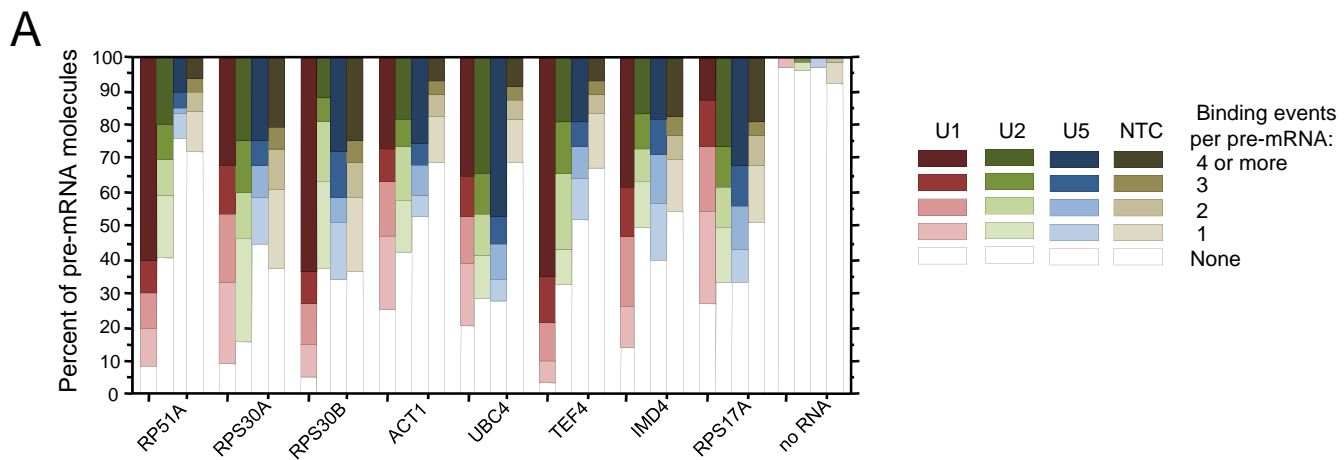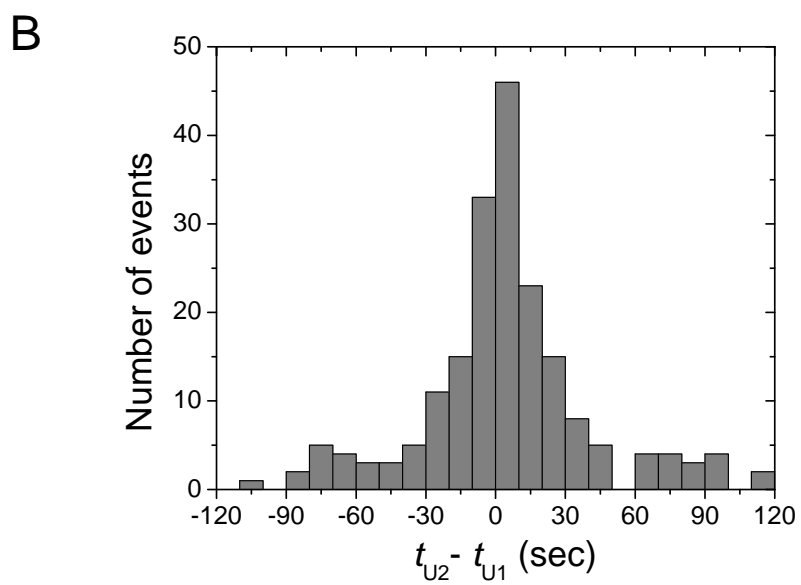

**Figure S1. Related to Figure 2.**



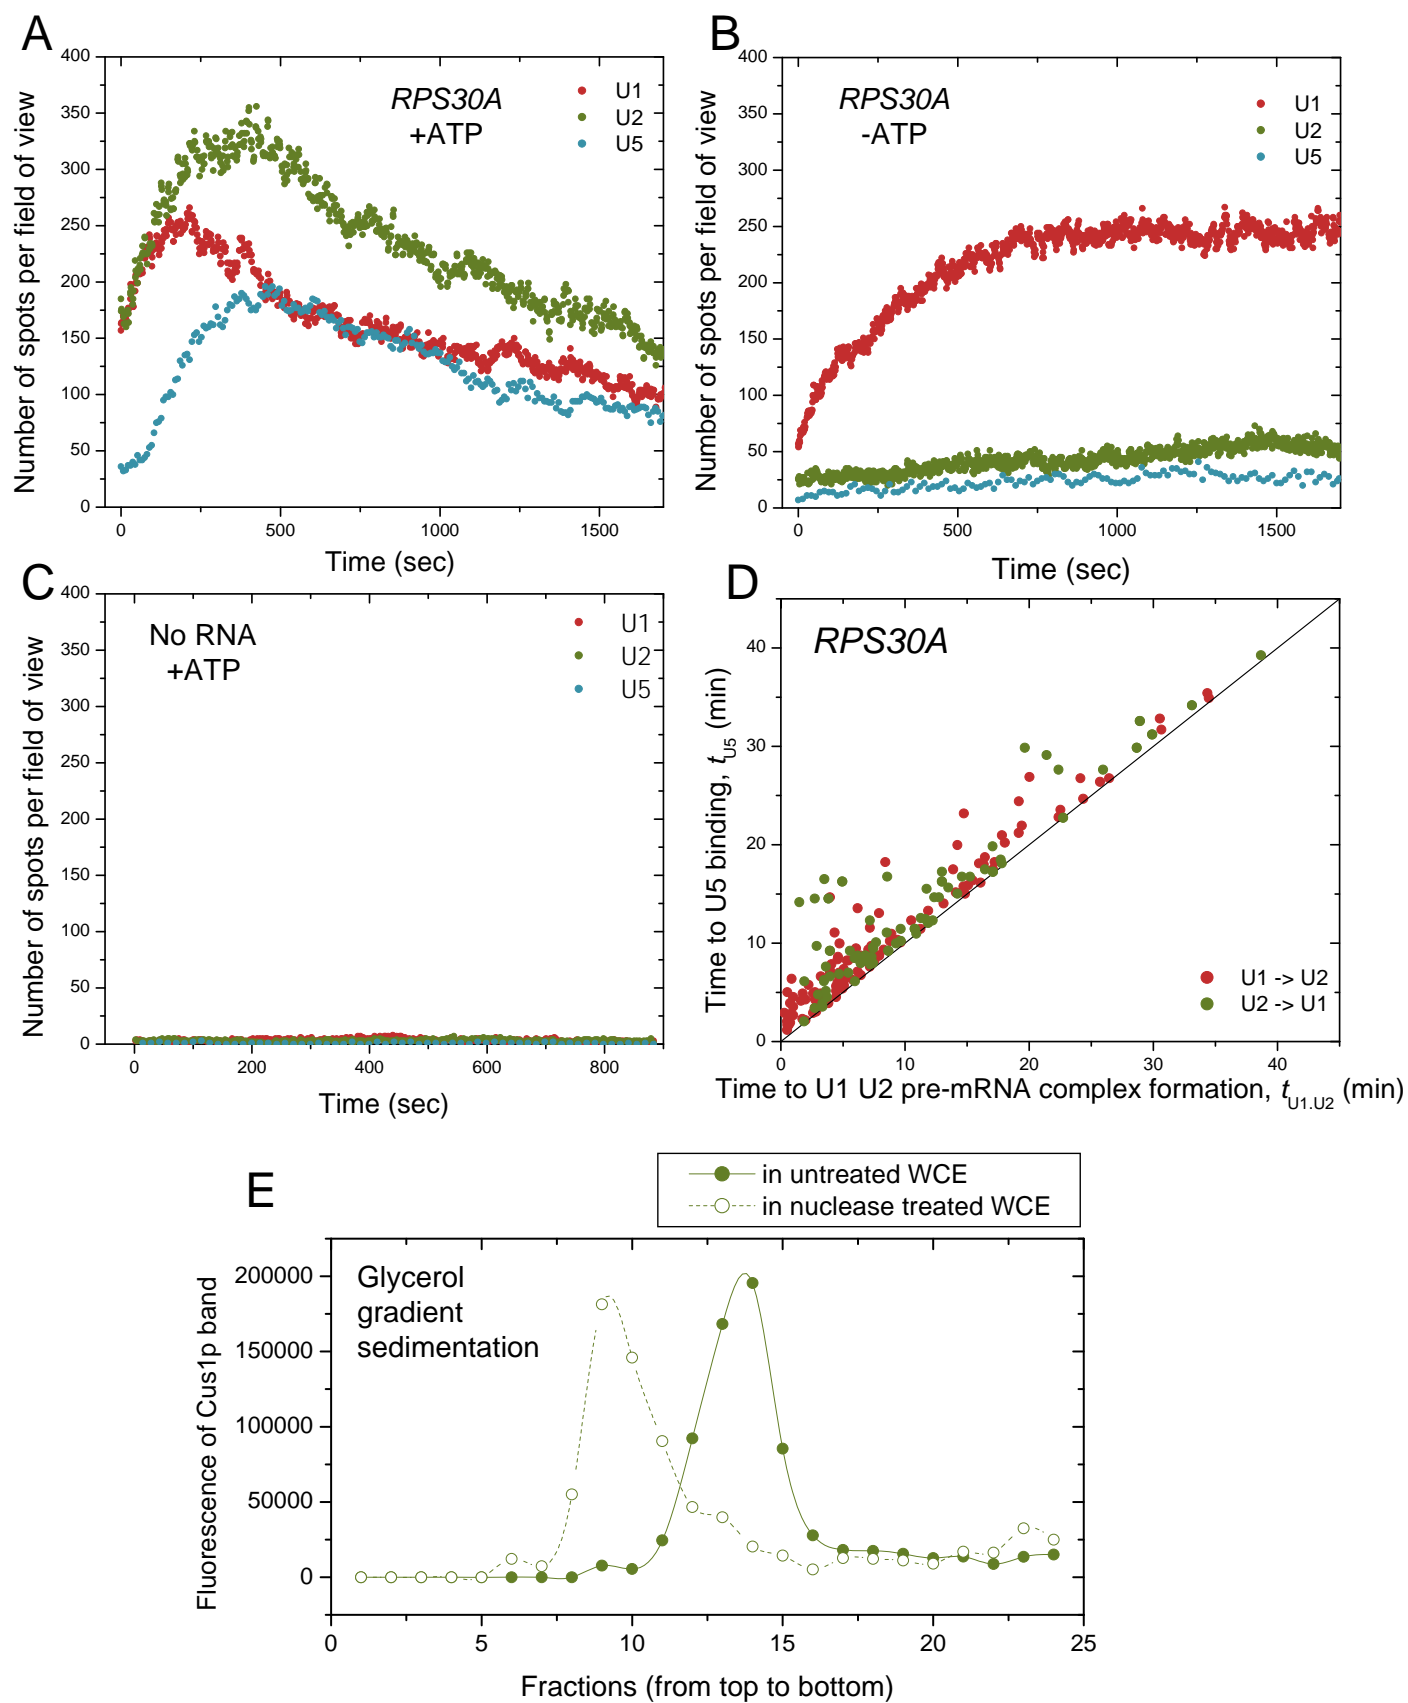

Figure S2. Related to Figure 3.
